# Supplementary material for: Prospective Evaluation of the Clinical Implications of the Tumor Metabolism and Chemotherapy-Related Changes in Advanced Biliary Tract Cancer
Source: HighWire-hosted journal article supplement (doi:10.2967/jnumed.116.186239), 2017-03-02
Supplement: 186239_Supplemental_Data.pdf [file 186239_Supplemental_Data.pdf]

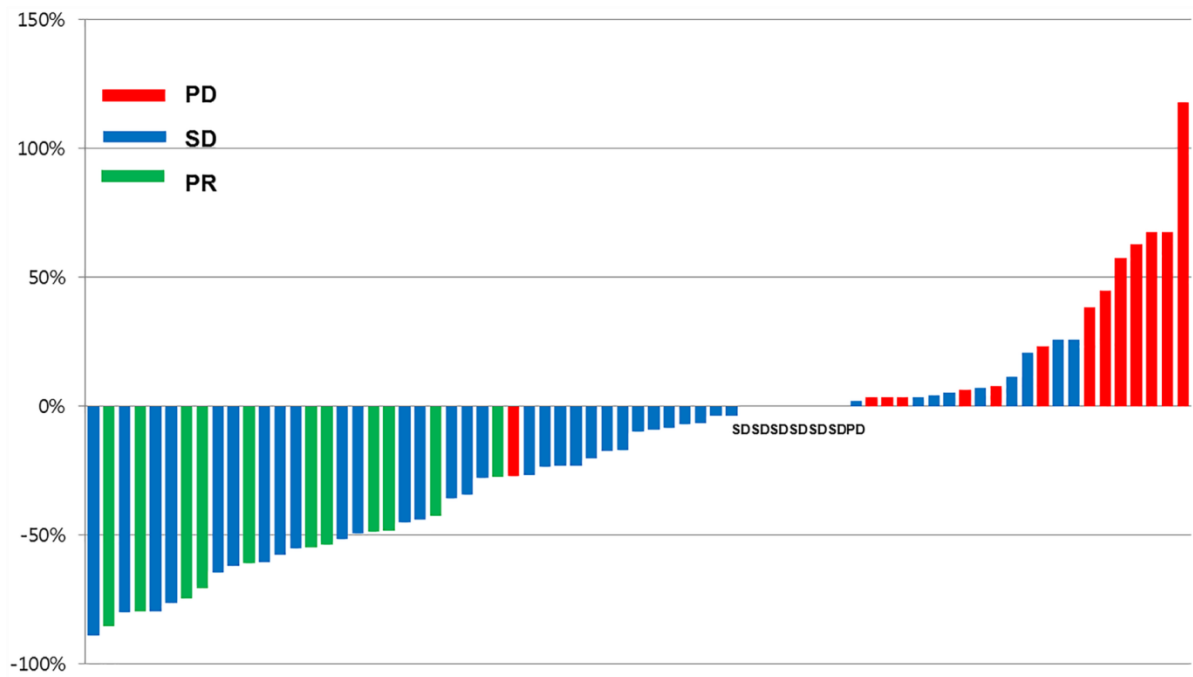

**Supplemental FIGURE 1.** Waterfall plot according to change in SUVmax and disease response according to RECIST 1.1 using the corresponding contrast-enhanced computed tomography method.

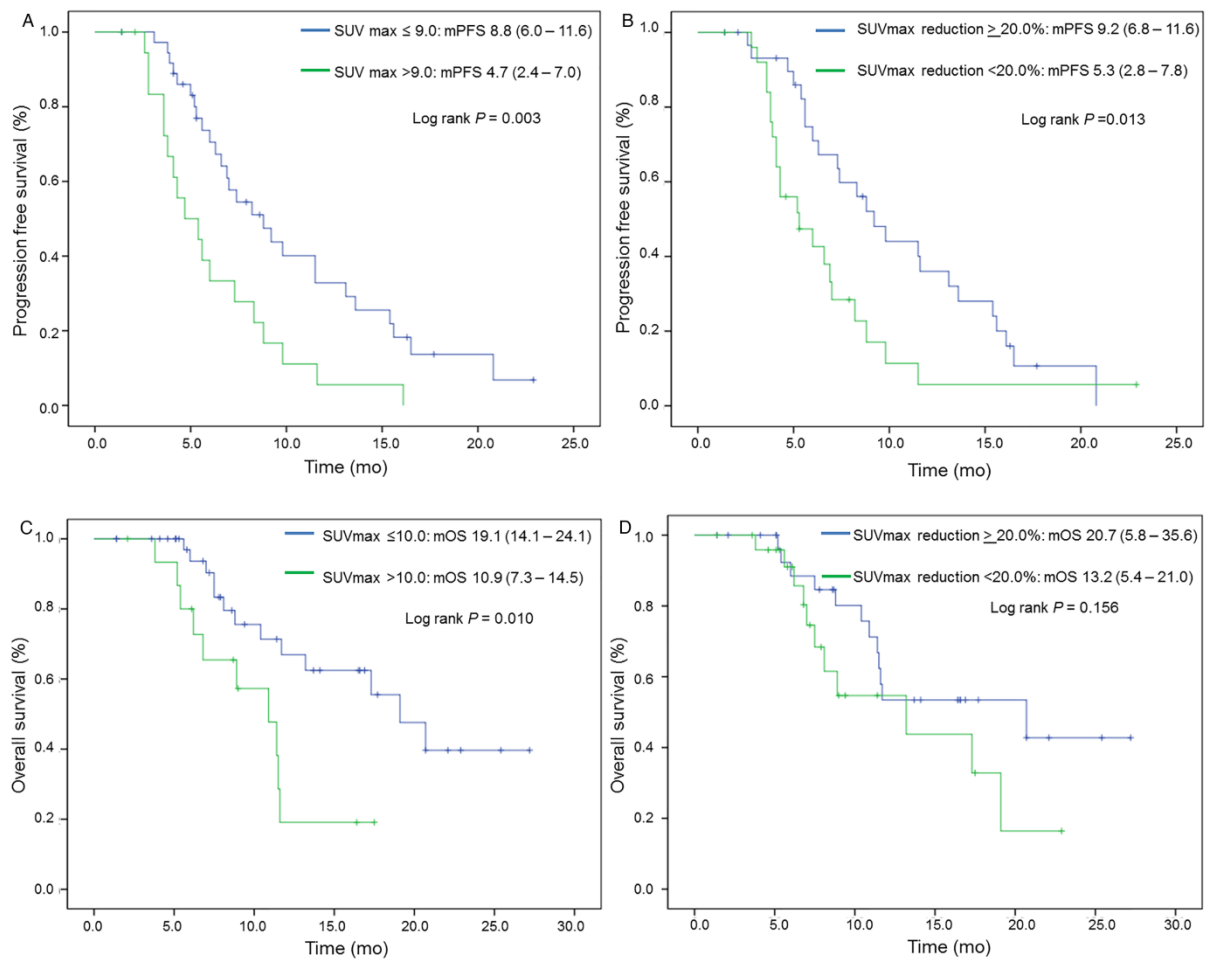

**Supplemental FIGURE 2.** Progression-free survival and overall survival according to the initial  $SUV_{max}$  (A and C) and  $SUV_{max}$  reduction at best metabolic response (B and D) among patients who achieved disease control.

**Supplemental Table 1. Distribution of Initial SUV<sub>max</sub> and <sup>18</sup>F-FDG PET Response**

|                                                                        |                     |
|------------------------------------------------------------------------|---------------------|
| Initial SUV <sub>max</sub>                                             |                     |
| Among all lesions, median (range)                                      | 8.6 (1.0–20.5)      |
| Among primary lesions, median (range)                                  | 3.9 (1.0–20.5)      |
| Among metastatic lesions, median (range)                               | 5.8 (1.0–15.2)      |
| SUV <sub>max</sub> reduction among all lesions at                      |                     |
| Best <sup>18</sup> F-FDG PET response (%), median (range)              | 9.5% (-162.5–88.8%) |
| 1 <sup>st</sup> <sup>18</sup> F-FDG PET evaluation (%), median (range) | 5.2% (-162.5–85.3%) |
| Initial number of organs with FDG uptake                               |                     |
| Median (range)                                                         | 2 (0–5)             |
| Initial number of lesions with FDG uptake                              |                     |
| Median (range)                                                         | 2 (0–41)            |

Abbreviations: SUV, standardized uptake value; FDG, fluorodeoxyglucose; PET, positron emission tomography.

**Supplemental Table 2. Initial SUV<sub>max</sub> and SUV<sub>max</sub> Reduction Cut-off to Predict PFS and OS**

| Initial SUV <sub>max</sub> | <i>P</i> value for PFS | <i>P</i> value for OS | SUV <sub>max</sub> reduction at best <sup>18</sup> F-FDG PET response | <i>P</i> value for PFS | <i>P</i> value for OS |
|----------------------------|------------------------|-----------------------|-----------------------------------------------------------------------|------------------------|-----------------------|
| 5                          | 0.201                  | 0.12                  | ≥-10.0%                                                               | <b>&lt;0.001</b>       | 0.921                 |
| 6                          | 0.171                  | 0.106                 | ≥0.0%                                                                 | <b>&lt;0.001</b>       | 0.146                 |
| 7                          | 0.057                  | 0.077                 | ≥10.0%                                                                | <b>0.001</b>           | 0.156                 |
| 8                          | <b>0.032</b>           | 0.12                  | ≥20.0%                                                                | <b>&lt;0.001</b>       | <b>0.074</b>          |
| 9                          | <b>0.002</b>           | <b>0.047</b>          | ≥30.0%                                                                | <b>0.005</b>           | 0.096                 |
| 10                         | <b>0.007</b>           | <b>0.003</b>          | ≥40.0%                                                                | <b>0.005</b>           | 0.08                  |
| 11                         | 0.065                  | <b>0.016</b>          | ≥50.0%                                                                | <b>0.029</b>           | 0.119                 |

Abbreviations: SUV, standardized uptake value; PFS, progression free survival; OS, overall survival; FDG, fluorodeoxyglucose; PET, positron emission tomography.

**Supplemental Table 3. Comparison of Initial SUV<sub>max</sub> According to Patient Characteristics**

| Characteristics                | No. | Mean SUV <sub>max</sub> ± SD | P value      |
|--------------------------------|-----|------------------------------|--------------|
| Age, y                         |     |                              | 0.893        |
| ≤ 65                           | 43  | 8.0 ± 4.8                    |              |
| > 65                           | 32  | 8.2 ± 3.4                    |              |
| Sex                            |     |                              | 0.811        |
| Women                          | 32  | 8.2 ± 4.0                    |              |
| Men                            | 43  | 8.0 ± 4.4                    |              |
| Primary tumor origin           |     |                              | 0.120        |
| GB cancer                      | 28  | 9.1 ± 4.9                    |              |
| IHCC                           | 22  | 8.1 ± 4.3                    |              |
| EHCC                           | 19  | 6.2 ± 3.0                    |              |
| AoV cancer                     | 6   | 8.9 ± 1.6                    |              |
| Histologic Differentiation     |     |                              | 0.233        |
| WD                             | 3   | 8.8 ± 4.5                    |              |
| MD                             | 38  | 6.4 ± 3.6                    |              |
| PD                             | 12  | 8.1 ± 3.4                    |              |
| HER2 IHC                       |     |                              | 0.150        |
| Neg to 1+                      | 33  | 7.8 ± 3.6                    |              |
| 2 to 3+                        | 10  | 9.8 ± 4.6                    |              |
| c-MET IHC (cytoplasm)          |     |                              | 0.875        |
| Neg to 1+                      | 36  | 8.1 ± 4.1                    |              |
| 2+ to 3+                       | 7   | 7.9 ± 4.0                    |              |
| c-MET IHC (membrane)           |     |                              | 0.690        |
| Neg to 1+                      | 16  | 7.8 ± 3.4                    |              |
| 2+ to 3+                       | 27  | 8.3 ± 4.4                    |              |
| c-Myc                          |     |                              | <b>0.017</b> |
| Neg                            | 28  | 7.0 ± 3.2                    |              |
| Pos                            | 12  | 10.4 ± 5.2                   |              |
| Initial presentation at enroll |     |                              | <b>0.001</b> |
| Recurrent disease              | 40  | 6.6 ± 3.3                    |              |
| Unresectable disease           | 35  | 9.8 ± 4.6                    |              |
| CEA, ng/mL                     |     |                              | 0.089        |
| ≤5.0                           | 53  | 7.5 ± 4.2                    |              |
| >5.0                           | 20  | 9.4 ± 4.2                    |              |
| CA 19-9, U/mL                  |     |                              | 0.540        |
| ≤37.0                          | 27  | 7.7 ± 4.3                    |              |
| >37.0                          | 46  | 8.3 ± 4.2                    |              |
| WBC, /μL                       |     |                              | <b>0.001</b> |

|                         |    |            |                  |
|-------------------------|----|------------|------------------|
| ≤10,000                 | 69 | 7.6 ± 3.9  |                  |
| >10,000                 | 6  | 13.6 ± 4.3 |                  |
| Total bilirubin, mg/dL  |    |            | 0.136            |
| ≤1.2                    | 64 | 8.4 ± 4.2  |                  |
| >1.2                    | 11 | 6.3 ± 3.8  |                  |
| Albumin, mg/dL          |    |            | 0.794            |
| ≤3.9                    | 44 | 8.0 ± 4.4  |                  |
| >3.9                    | 31 | 8.2 ± 4.1  |                  |
| Organs with FDG uptake  |    |            | <b>&lt;0.001</b> |
| 0 to 2                  | 56 | 7.1 ± 3.9  |                  |
| ≥3                      | 19 | 11.0 ± 3.8 |                  |
| Lesions with FDG uptake |    |            | <b>&lt;0.001</b> |
| 0 to 2                  | 41 | 6.6 ± 4.0  |                  |
| ≥3                      | 34 | 9.9 ± 3.8  |                  |
| Objective response      |    |            | 0.414            |
| Yes                     | 12 | 9.1 ± 4.3  |                  |
| No                      | 60 | 8.0 ± 4.2  |                  |
| Disease control         |    |            | 0.149            |
| Yes                     | 57 | 7.8 ± 4.1  |                  |
| No                      | 15 | 9.6 ± 4.2  |                  |

Abbreviations: SUV, standardized uptake value; SD, standard deviation; GB, gall bladder; IHCC, intrahepatic cholangiocarcinoma; EHCC, extrahepatic cholangiocarcinoma; AoV, Ampulla of Vater; WD, well differentiated; MD, moderately differentiated; PD, poorly differentiated; HER-2, human epidermal growth factor receptor 2; CEA, carcinoembryonic antigen; CA 19-9, carbohydrate antigen 19-9; WBC, white blood cell; FDG, fluorodeoxyglucose.
